# Supplementary figures and images for: Learning from deregulation: The asymmetric impact of lockdown and reopening on risky behavior during COVID‐19
Source: PubMed Central journal article supplement — J Reg Sci. 2021 Jun 7;61(4):696–709. doi: 10.1111/jors.12539 (PMC8242873; doi:10.1111/jors.12539), 2021-06-07

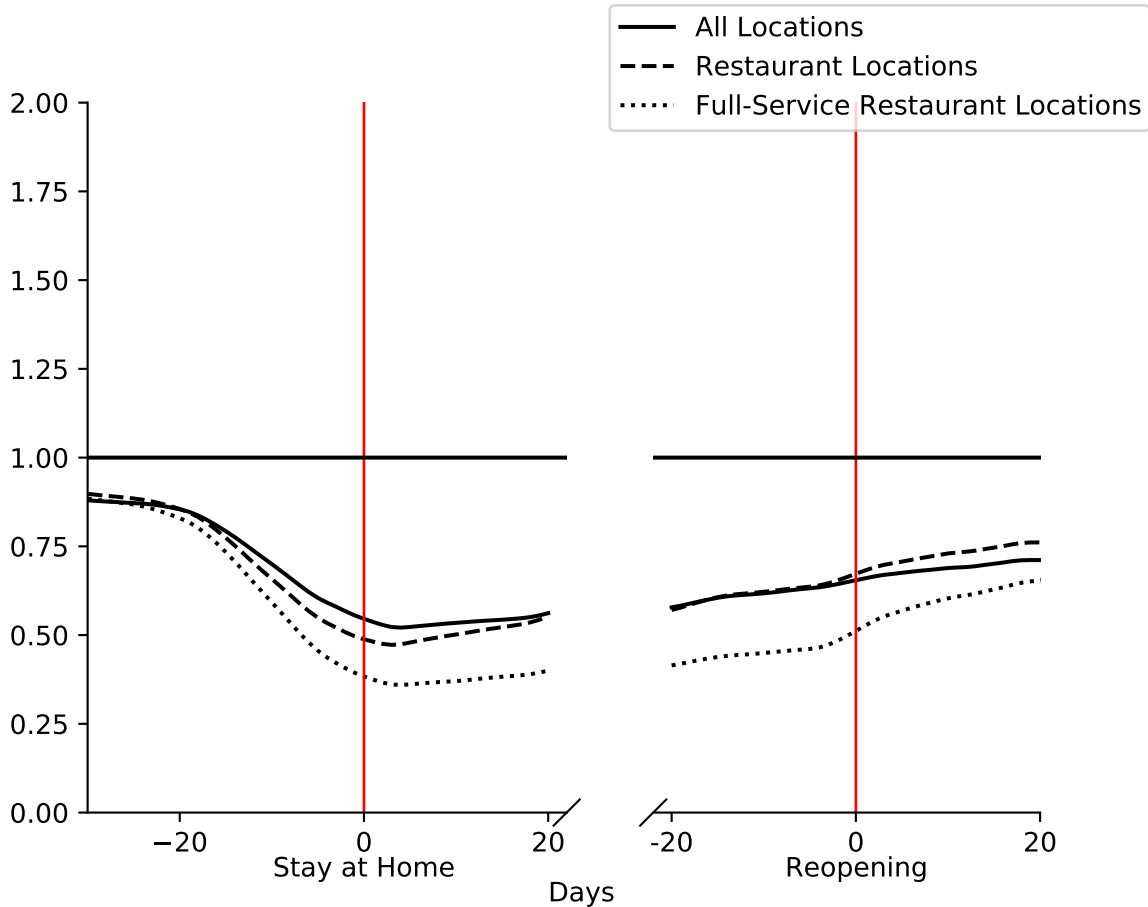

Supplement: JORS-61-696-s001.pdf [file JORS-61-696-s001.pdf]

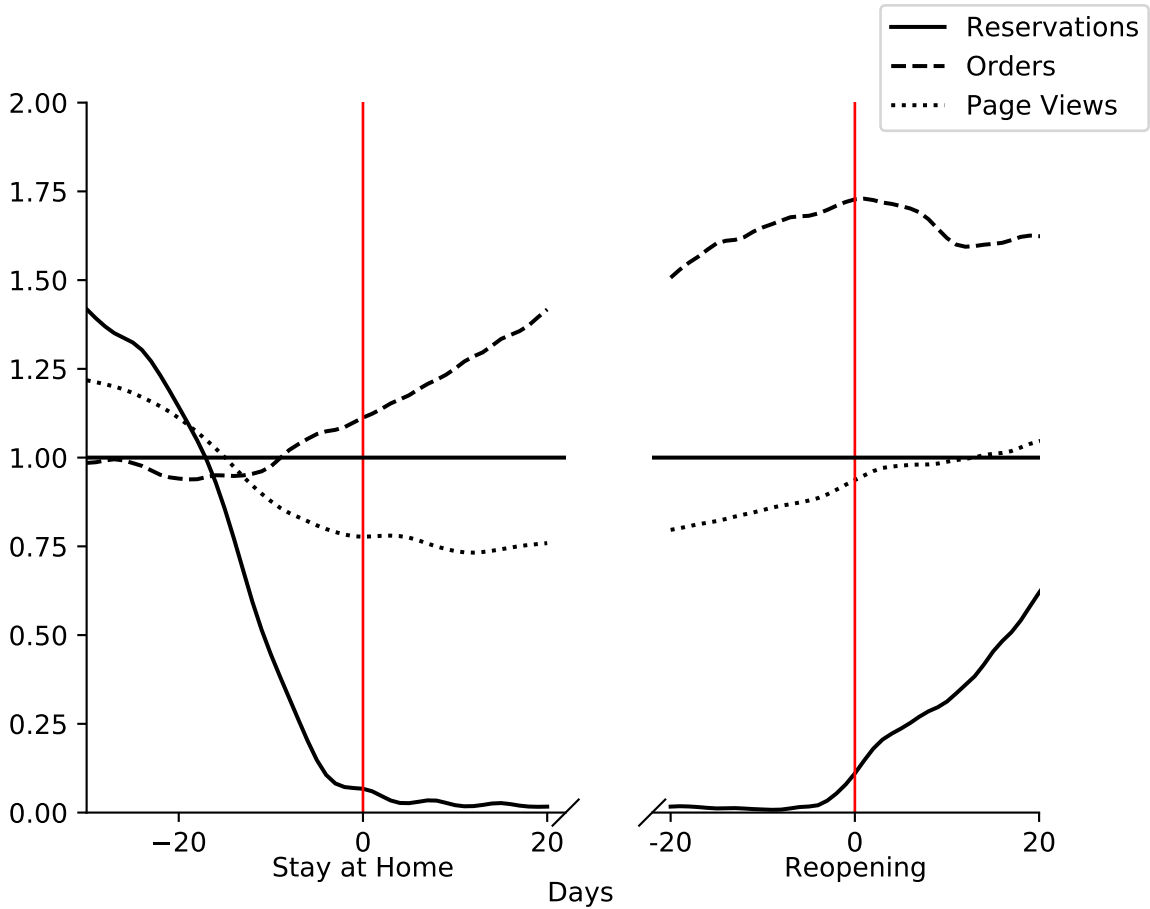

Supplement: JORS-61-696-s002.pdf [file JORS-61-696-s002.pdf]

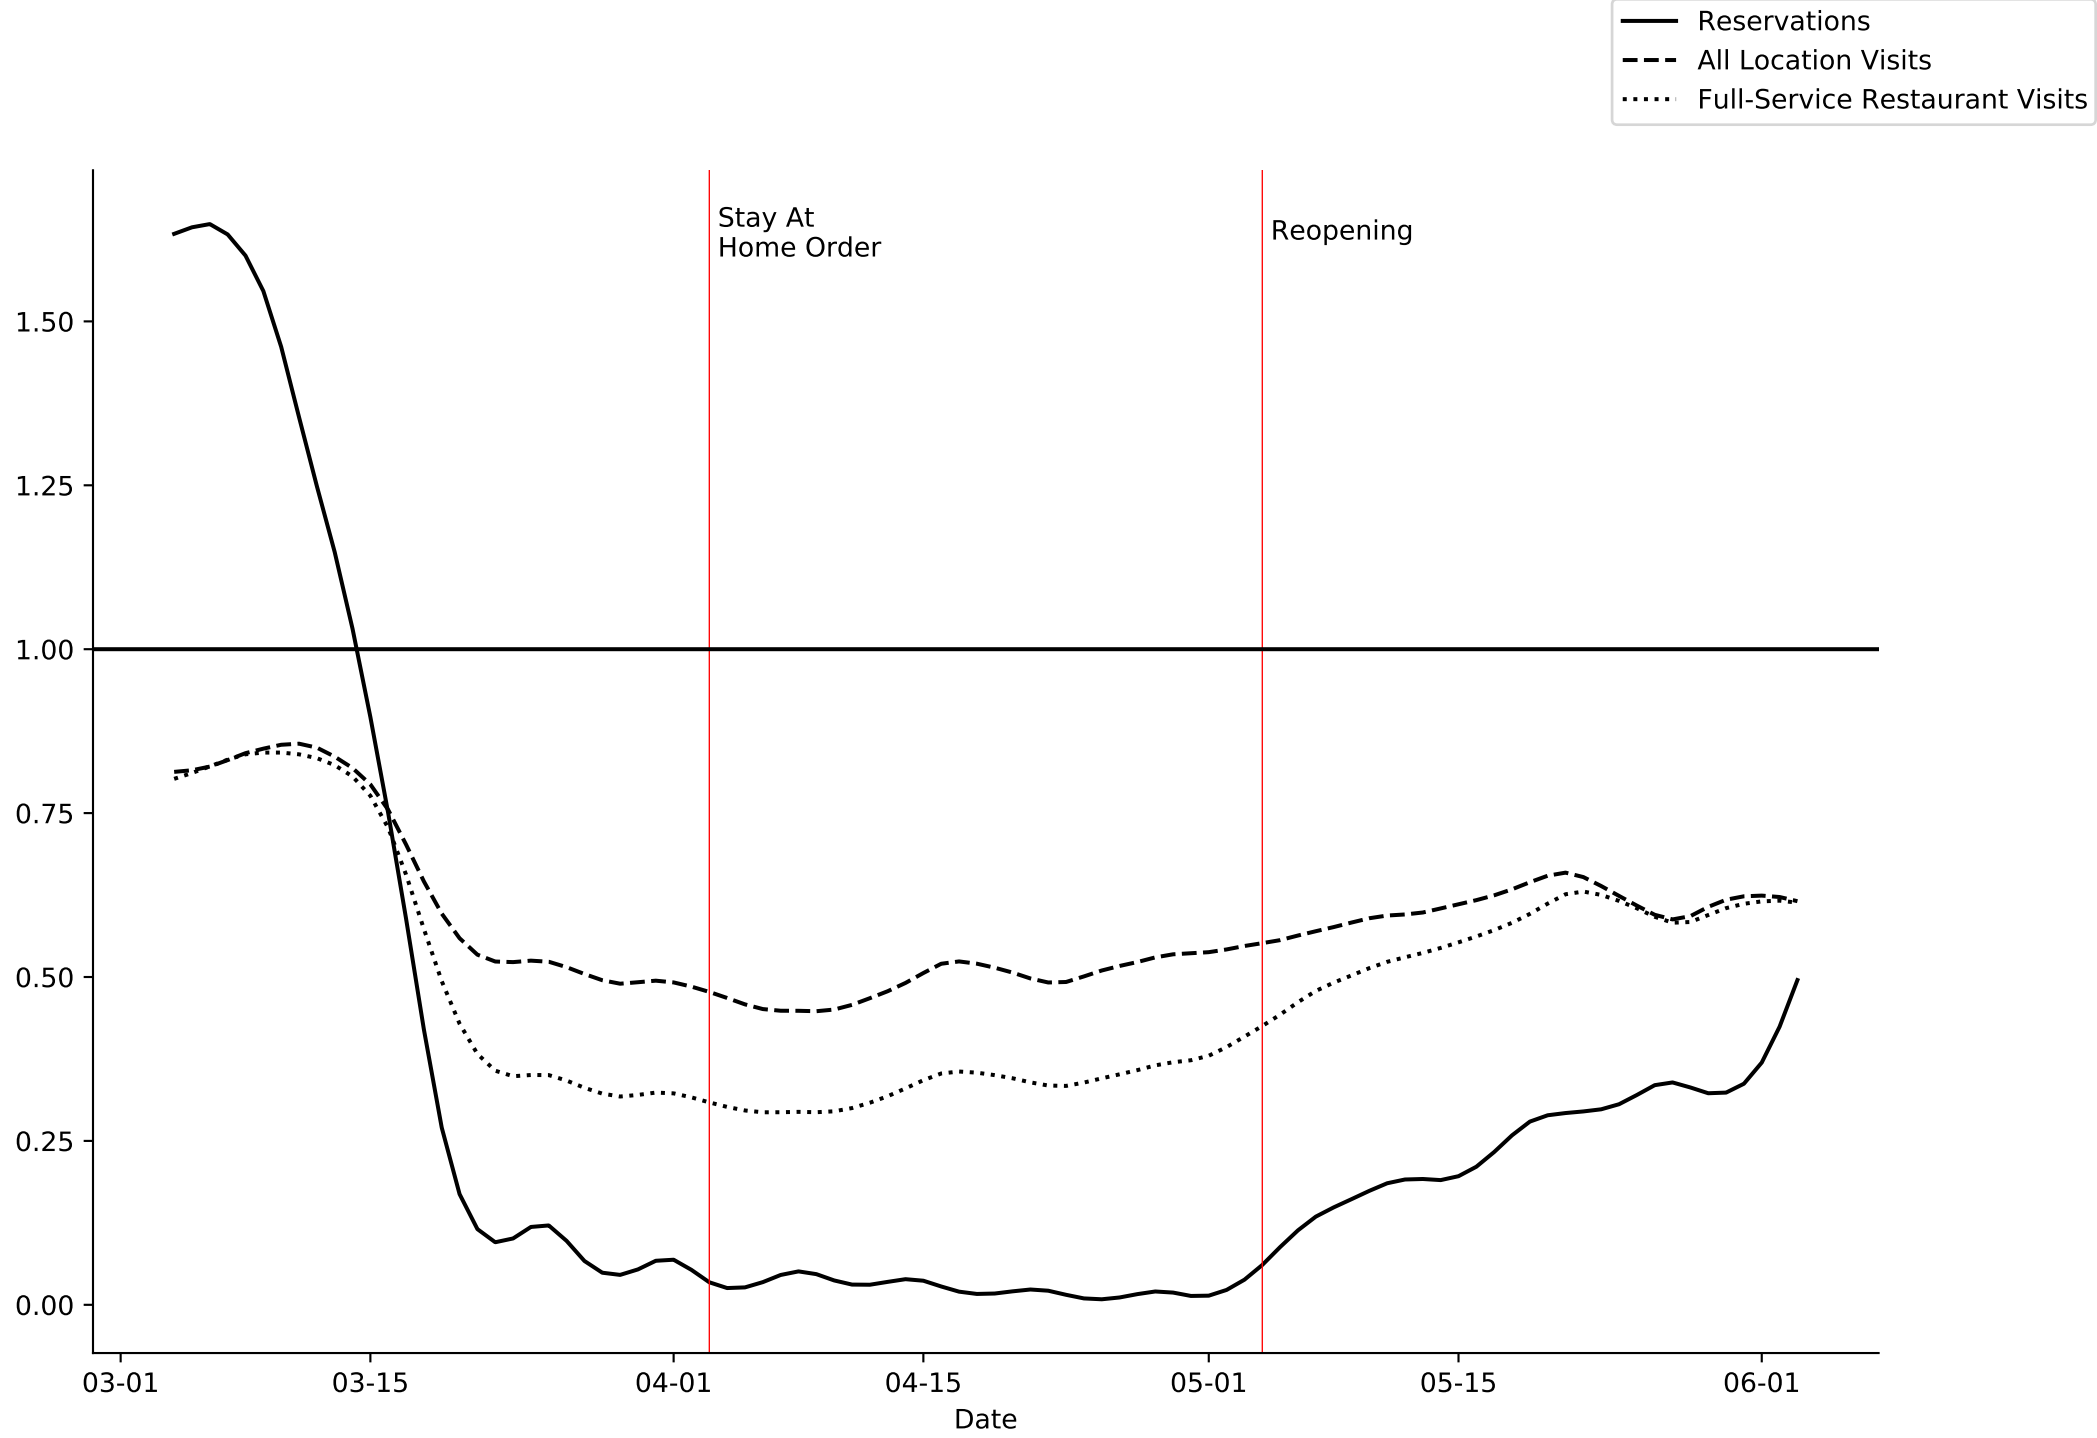

Supplement: JORS-61-696-s004.pdf [file JORS-61-696-s004.pdf]

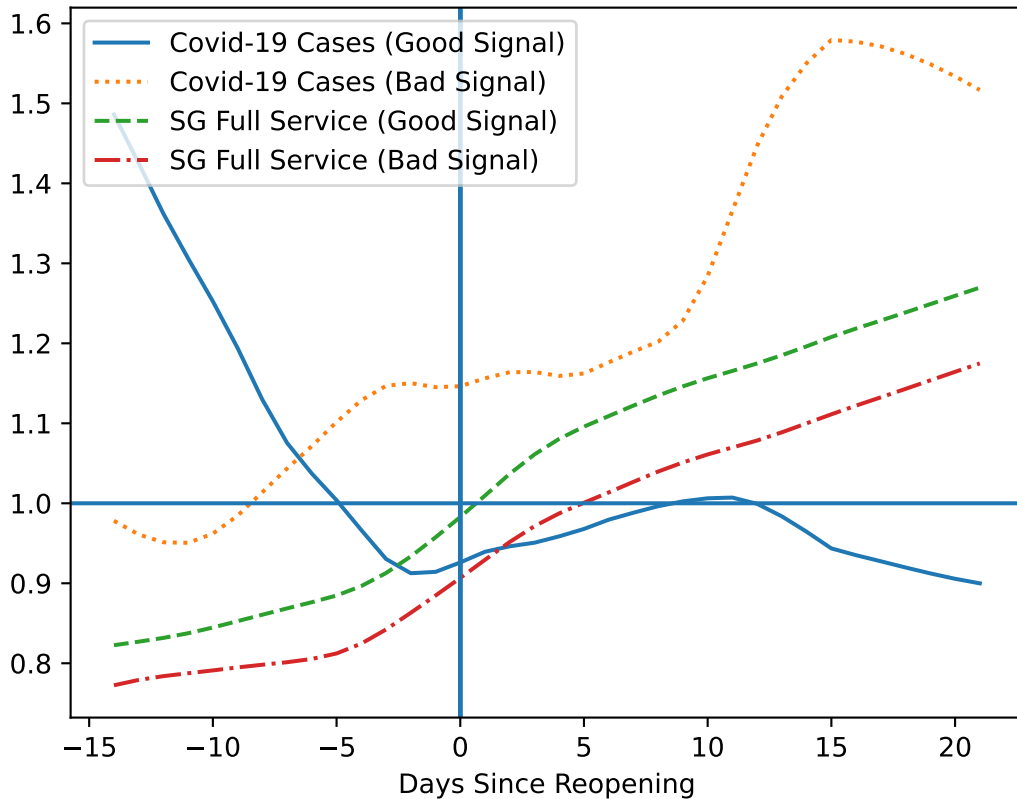

Supplement: JORS-61-696-s005.pdf [file JORS-61-696-s005.pdf]

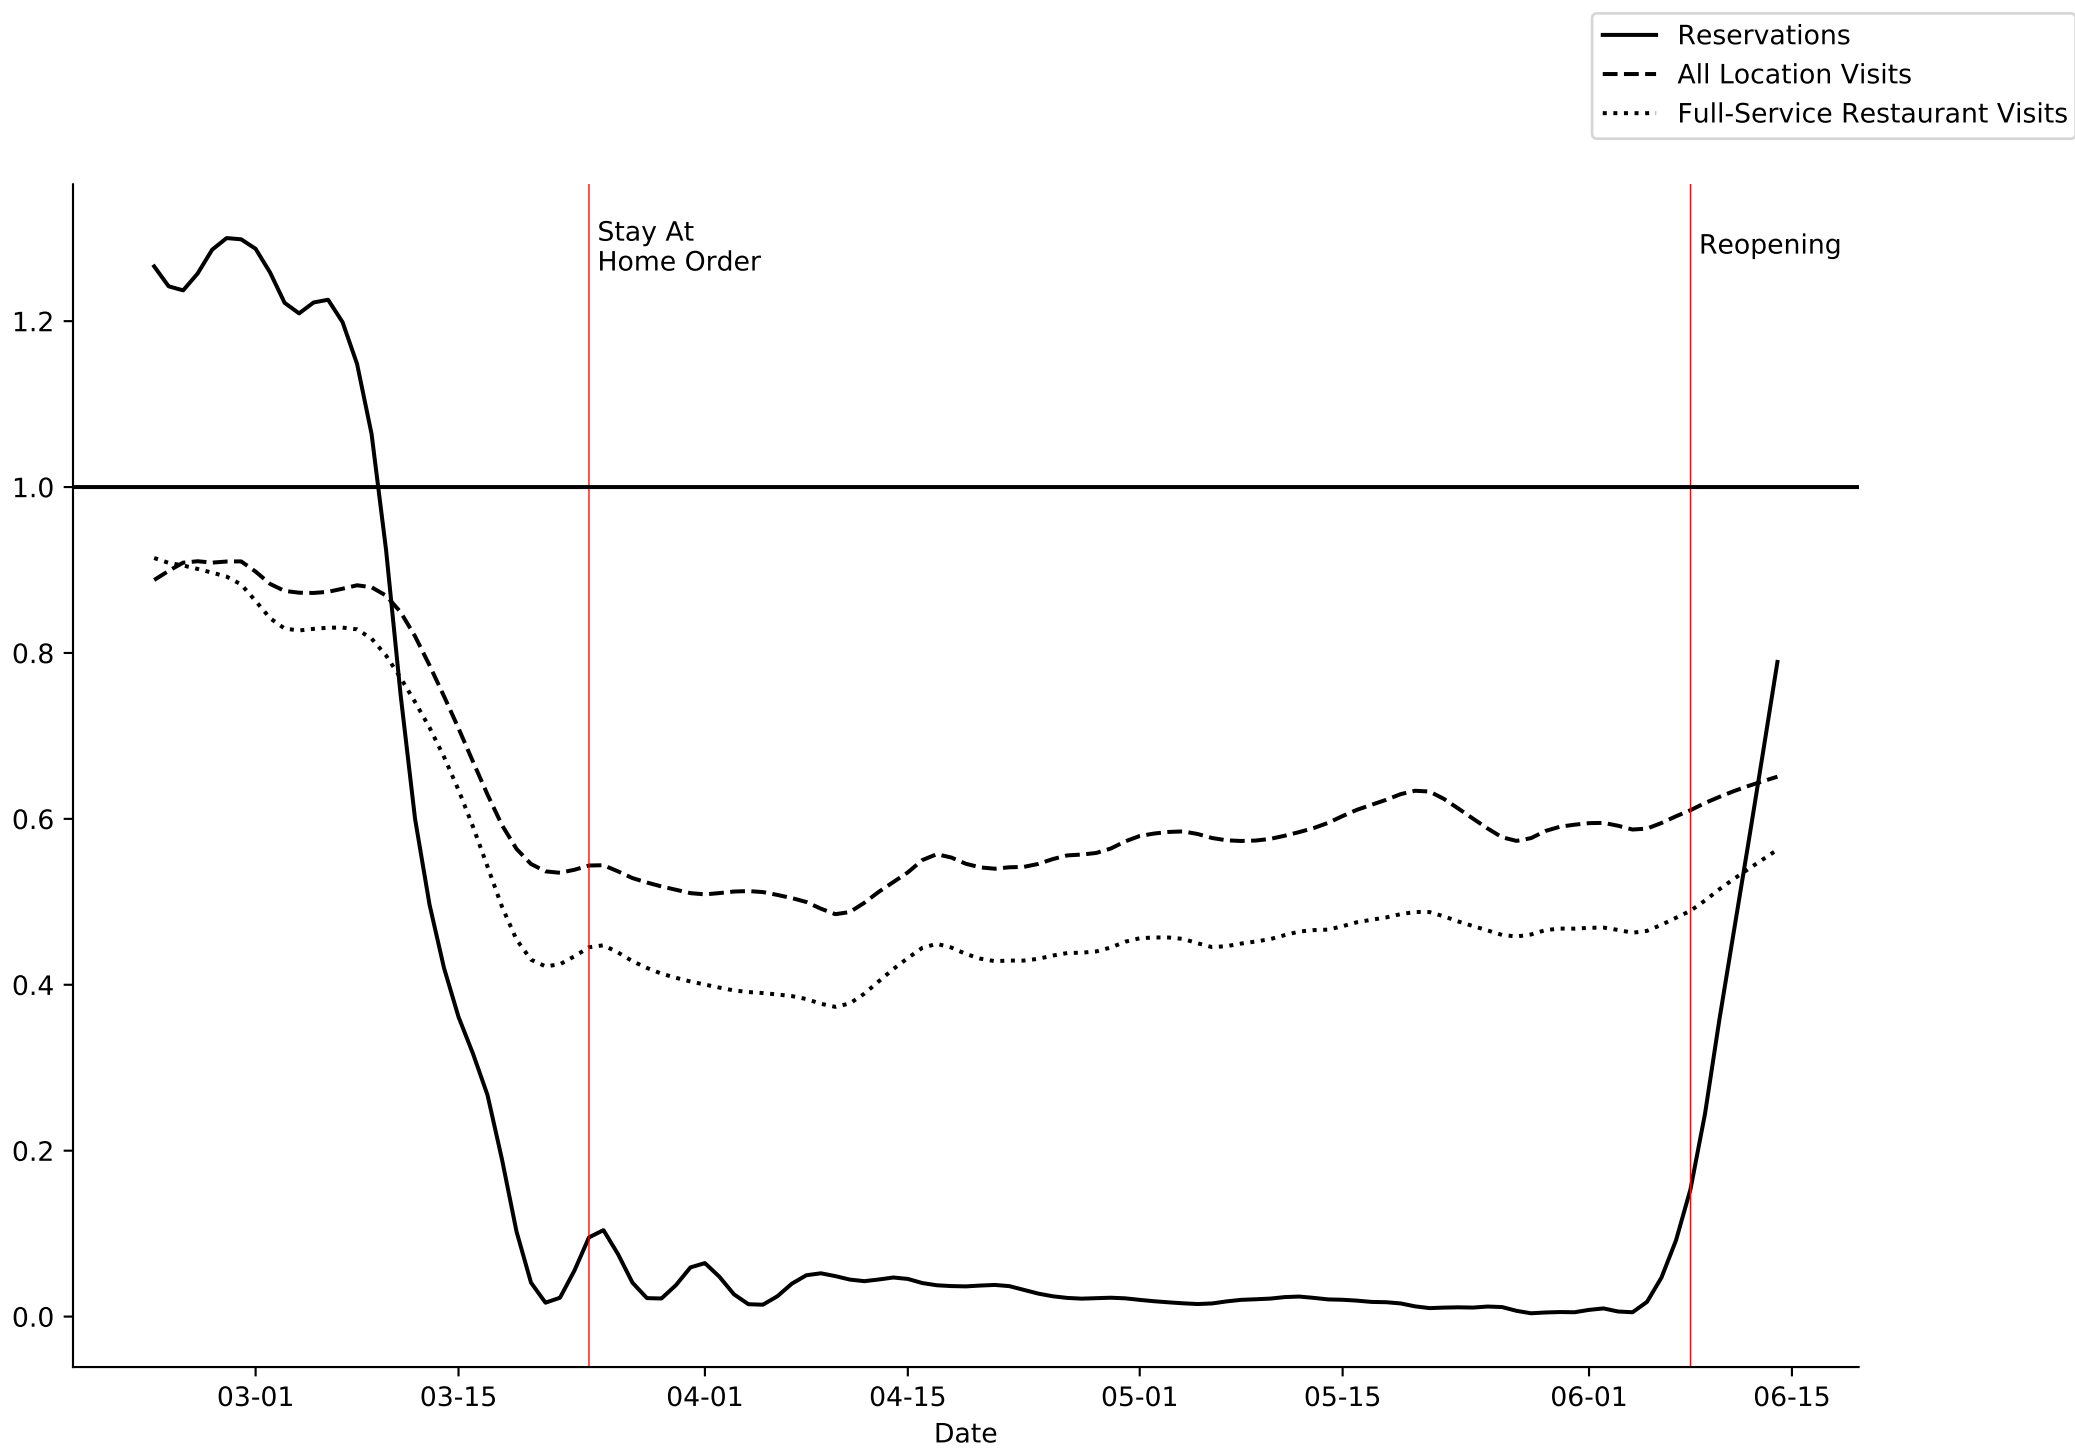

Supplement: JORS-61-696-s008.pdf [file JORS-61-696-s008.pdf]

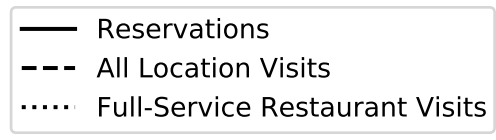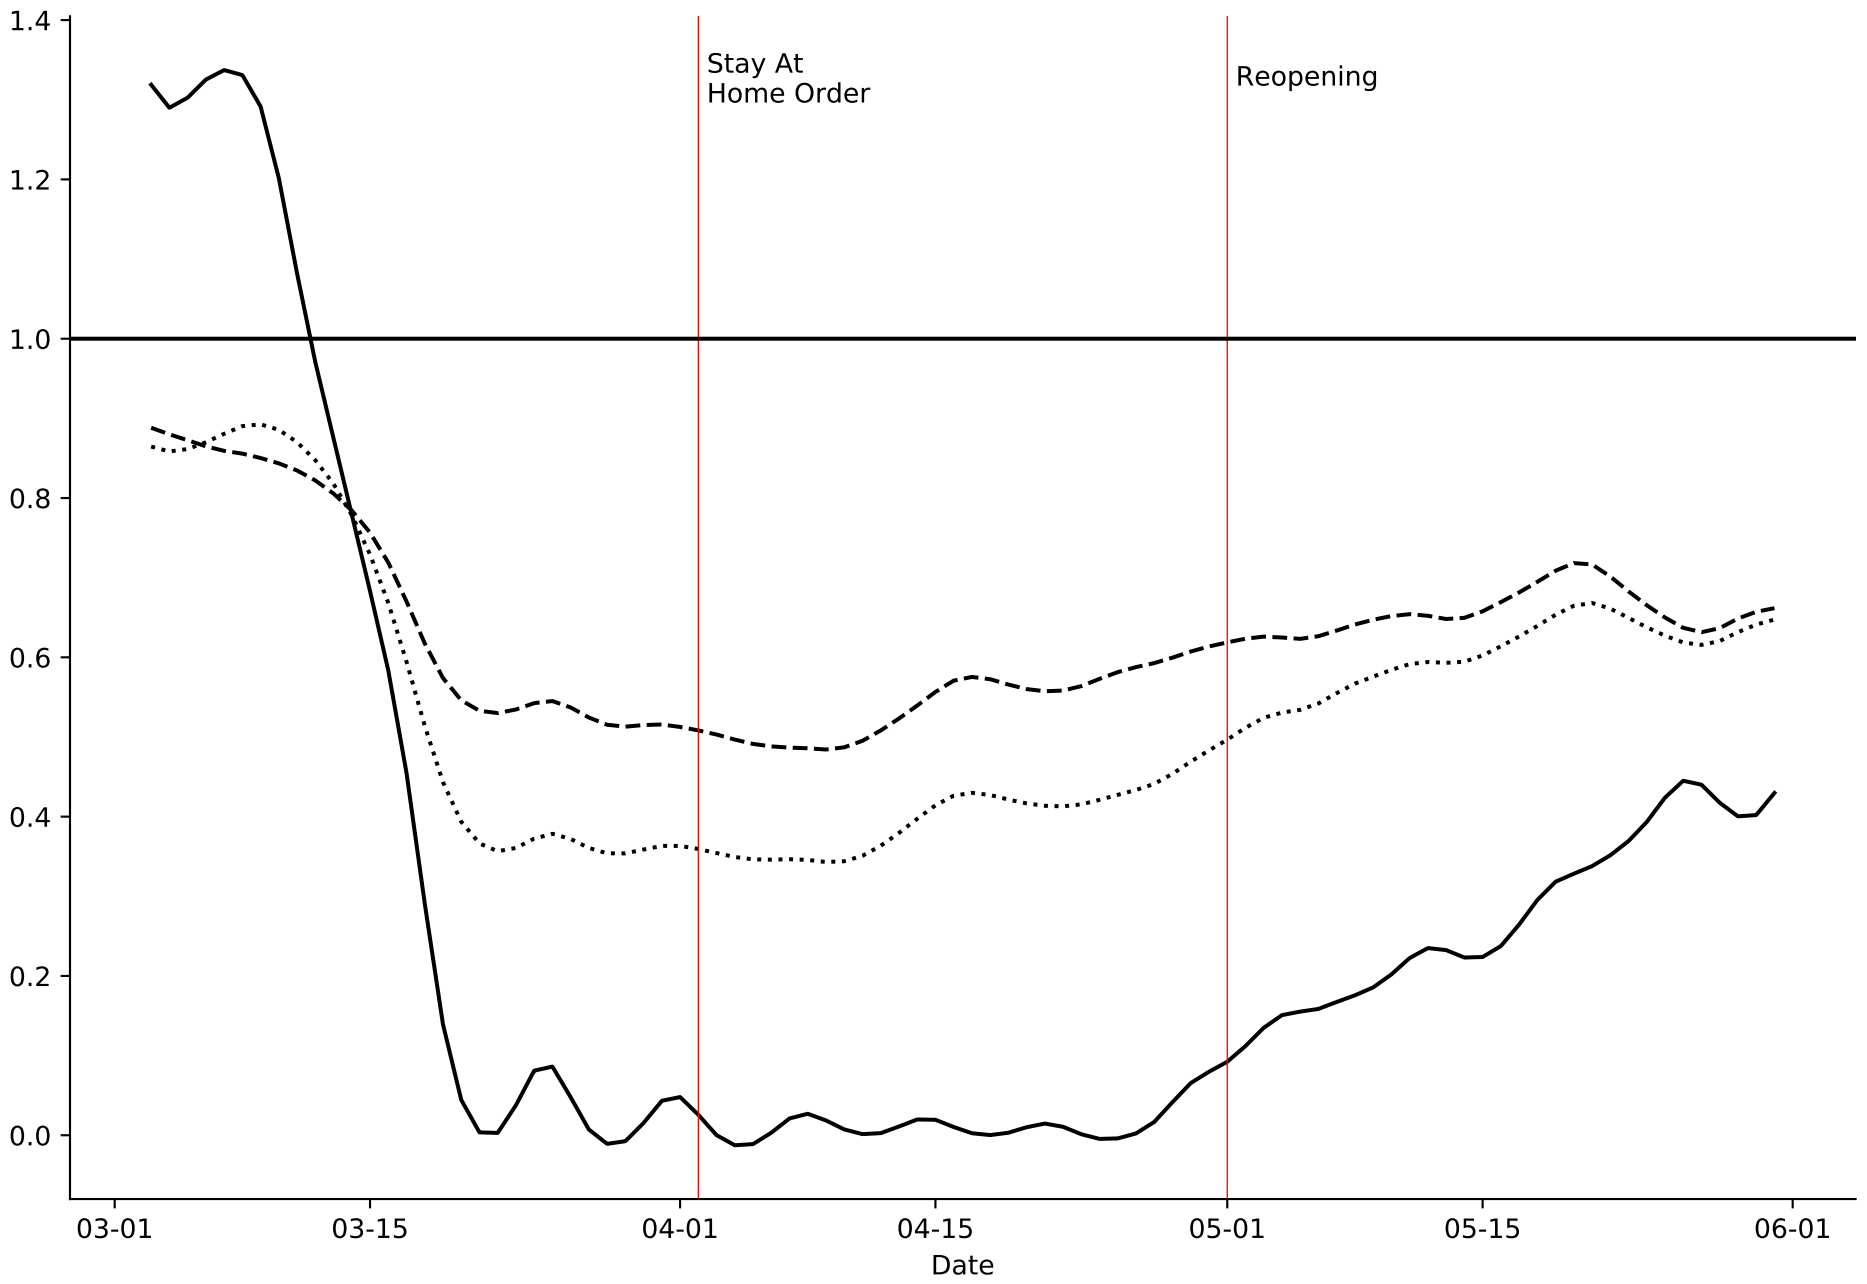

Supplement: JORS-61-696-s009.pdf [file JORS-61-696-s009.pdf]

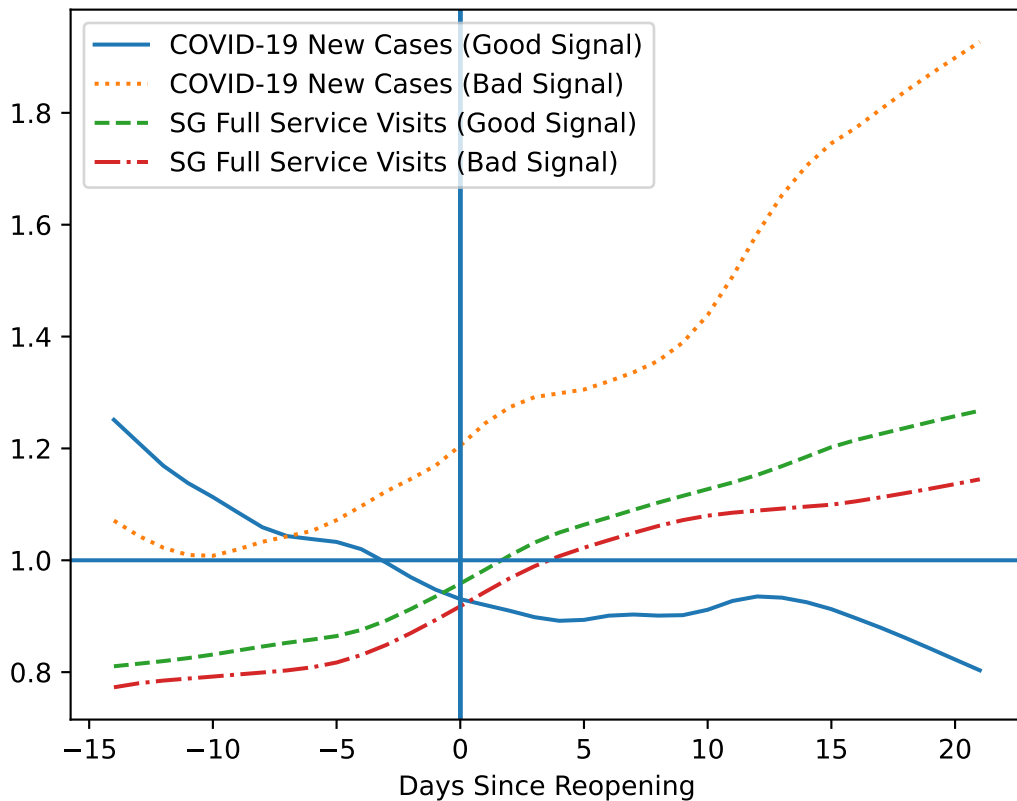

Supplement: JORS-61-696-s011.pdf [file JORS-61-696-s011.pdf]
